# Supplementary material for: An efficient Cu-based catalyst for the hydrogenation of ethylene carbonate to ethylene glycol and methanol
Source: Royal Society of Chemistry journal article supplement (doi:10.1039/c9cy01586h), 2019-01-01
Supplement: c9cy01586h1.pdf [file c9cy01586h1.pdf]

## Supporting Information

For

**An efficient Cu-based catalyst for the hydrogenation of ethylene carbonate to ethylene glycol and methanol**

Wei Chen, Tongyang Song, Jingxia Tian, Peng Wu, Xiaohong Li\*

Shanghai Key Laboratory of Green Chemistry and Chemical Processes, School of Chemistry and Molecular Engineering, East China Normal University, 3663 North Zhongshan Rd., Shanghai 200062, China.

Corresponding author: Xiaohong Li

Tel: 0086-21-62238590

E-mail: xhli@chem.ecnu.edu.cn

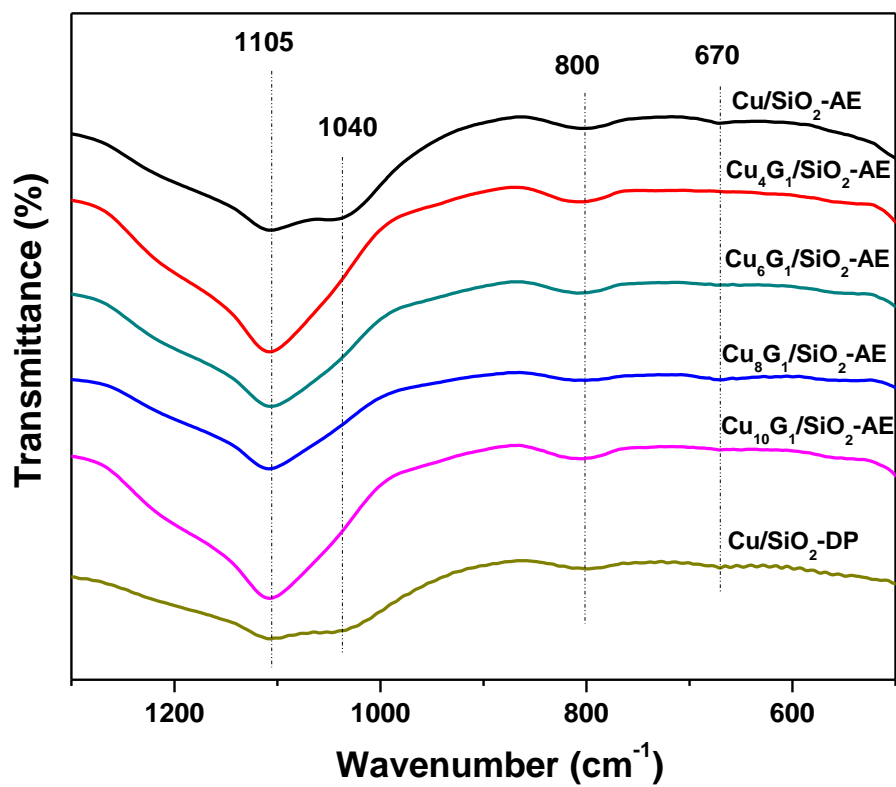

**Fig. S1** FT-IR spectra of as-calcined Cu/SiO<sub>2</sub>-DP, Cu/SiO<sub>2</sub>-AE and Cu<sub>x</sub>G<sub>1</sub>/SiO<sub>2</sub>-AE after calcined in air at 450 °C for 4 h.

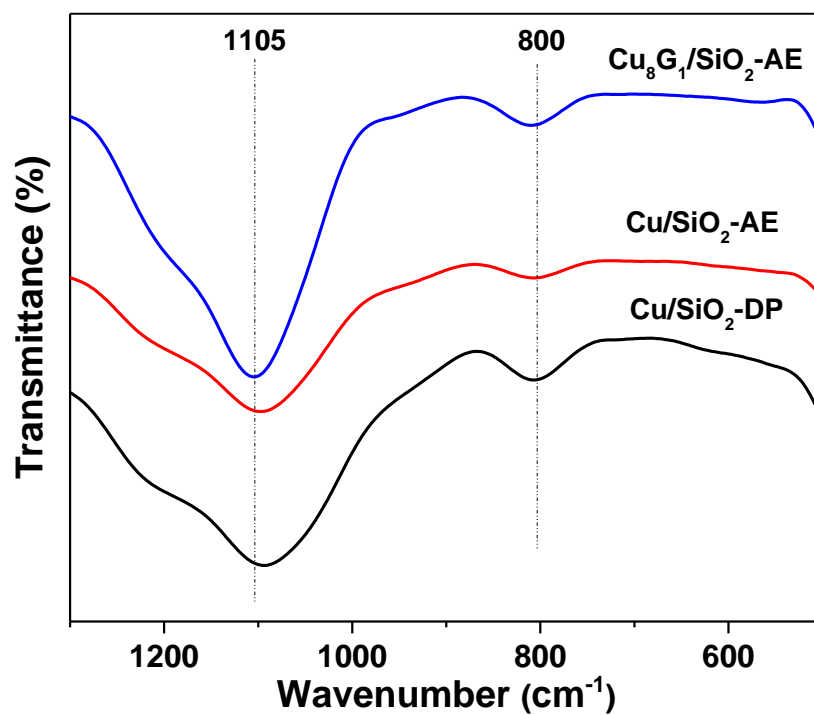

**Fig. S2** FT-IR spectra of the Cu/SiO<sub>2</sub>-DP, Cu/SiO<sub>2</sub>-AE and Cu<sub>8</sub>G<sub>1</sub>/SiO<sub>2</sub>-AE catalysts after pretreated in flowing hydrogen at 350 °C for 1 h.

**Table S1** Reaction results obtained with the Cu<sub>8</sub>G<sub>1</sub>/SiO<sub>2</sub>-AE catalyst in the different solvents for the hydrogenation of EC to yield ME and TG.

| Catalyst                                             | Solvent         | EC conv.(%) | Sel. (%) |    |
|------------------------------------------------------|-----------------|-------------|----------|----|
|                                                      |                 |             | ME       | EG |
| Cu <sub>8</sub> G <sub>1</sub> /SiO <sub>2</sub> -AE | 1, 4-dioxane    | 96          | 86       | 99 |
| Cu <sub>8</sub> G <sub>1</sub> /SiO <sub>2</sub> -AE | Tetrahydrofuran | 92          | 78       | 97 |
| Cu <sub>8</sub> G <sub>1</sub> /SiO <sub>2</sub> -AE | ethanol         | 90          | 13       | 78 |

Reaction conditions: 10 mL 10 wt% EC in different solvent, 4 MPa H<sub>2</sub>, 0.176 g catalyst, 600 rpm, 180 °C and 2.5 h.

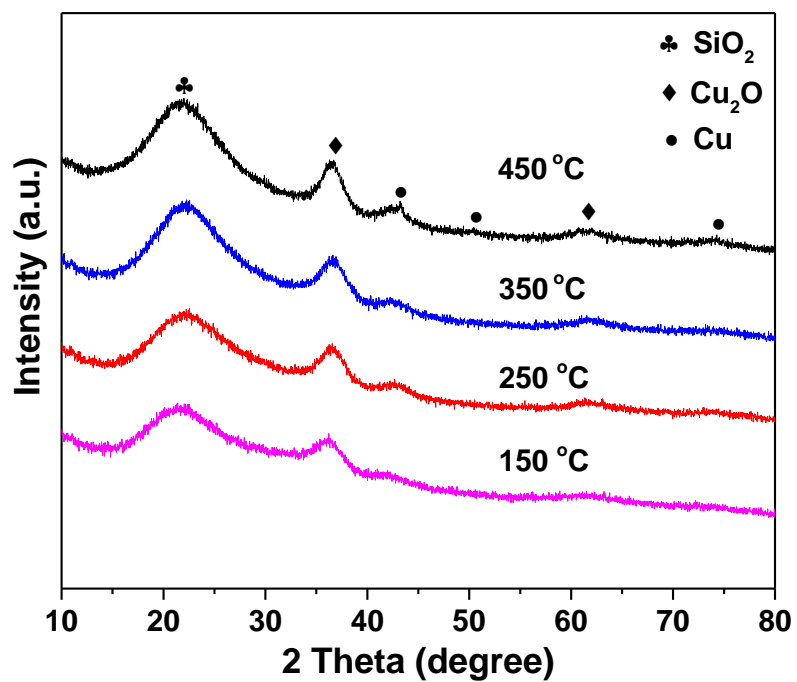

**Fig. S3** XRD patterns of the Cu<sub>8</sub>G<sub>1</sub>/SiO<sub>2</sub>-AE catalysts after reduced at different temperatures.

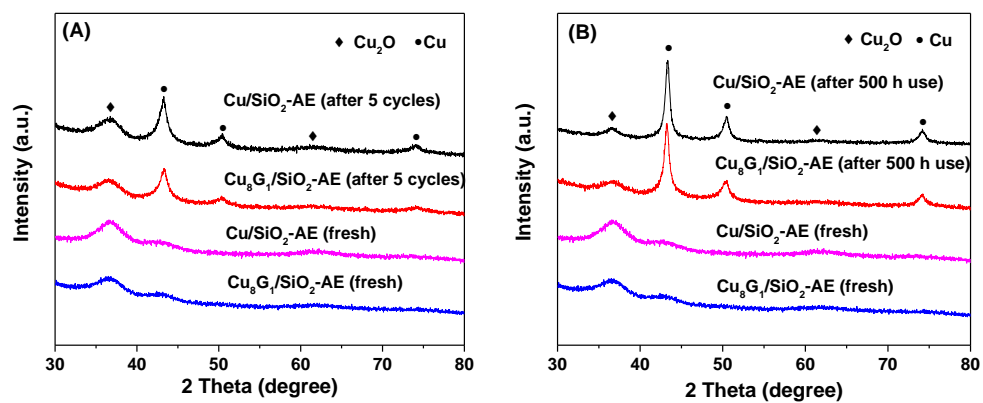

**Fig. S4** XRD patterns of the Cu<sub>8</sub>G<sub>1</sub>/SiO<sub>2</sub>-AE and Cu/SiO<sub>2</sub>-AE catalysts (A) before and after 5 cycles in a batch reactor and (B) before and after 500 h TOS in a fixed-bed reactor.

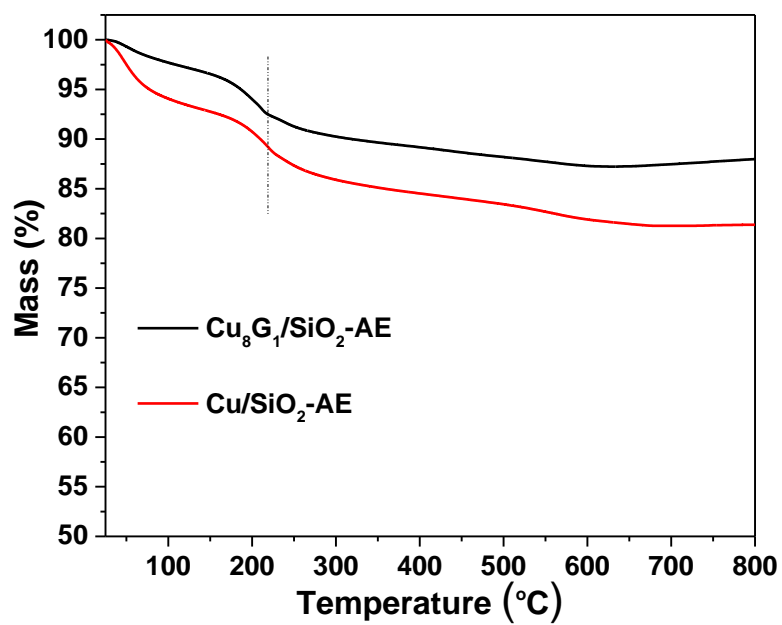

**Fig. S5** TG analyses of the used  $\text{Cu}/\text{SiO}_2\text{-AE}$  and  $\text{Cu}_8\text{G}_1/\text{SiO}_2\text{-AE}$  catalysts after 500 h TOS.

**Table S2** H<sub>2</sub>-TPD data

| <b>Catalyst</b>                                       | <b>H<sub>2</sub> desorption (μmol/g<sub>cat</sub>)</b> |                          |                          |       |
|-------------------------------------------------------|--------------------------------------------------------|--------------------------|--------------------------|-------|
|                                                       | T <sub>D1</sub> (112 °C)                               | T <sub>D2</sub> (320 °C) | T <sub>D3</sub> (580 °C) | Total |
| <b>Cu/SiO<sub>2</sub>-DP</b>                          | 19                                                     | 9                        | 146                      | 174   |
| <b>Cu/SiO<sub>2</sub>-AE</b>                          | 18                                                     | 5                        | 159                      | 182   |
| <b>Cu<sub>8</sub>G<sub>1</sub>/SiO<sub>2</sub>-AE</b> | 18                                                     | 17                       | 173                      | 207   |
